# Supplementary material for: Sphingosine-1 Phosphate Receptor Modulators Increase In Vitro Melanoma Cell Line Proliferation at Therapeutic Doses Used in Patients with Multiple Sclerosis
Source: PubMed Central journal article supplement — Neurol Ther. 2022 Dec 16;12(1):289–302. doi: 10.1007/s40120-022-00429-6 (PMC9837347; doi:10.1007/s40120-022-00429-6), 2022-12-16
Supplement: 40120_2022_429_MOESM1_ESM.pdf [file 40120_2022_429_MOESM1_ESM.pdf]

# Multiple-sclerosis patients treated with sphingosine-1 phosphate receptor modulators increase *in vitro* melanoma cell line proliferation at therapeutic doses

## Authors and Affiliations

C. Ruetsch-Chelli<sup>1,4</sup>, D. T Okuda<sup>2</sup>, F.Rocher<sup>3</sup>, S. Tartare-Deckert<sup>4</sup>, M. Deckert<sup>4</sup>, C. Lebrun-Frenay<sup>5</sup>

<sup>1</sup>Immunology department, Nice University Hospital, Côte d'Azur University, Nice, France

<sup>2</sup>The University of Texas Southwestern Medical Center, Dallas, Texas, U.S.A.,

<sup>3</sup>Pharmacology department, CHU Cimiez, Nice, France

<sup>4</sup>Université Côte d'Azur, INSERM, C3M, Team Microenvironment, Signaling and Cancer, Nice, France,

<sup>5</sup>Université Nice Cote d'Azur. UR2CA-URRIS, CRCSEP CHU de Nice, Nice, France

Title: 139 characters

Abstract count: 200 words

Introduction: 323 words

Material and Methods: 611 words

Results: 255 words

Discussion: 825 words

References: 37

Number of Table: 5

Number of Figures: 2

Supplementary datas: 2

**Corresponding author:** Caroline Ruetsch-Chelli, MD, MSc, Inserm U1065, Nice Côte d'Azur University. Archet Hospital. 151, route Saint-Antoine de Ginestière CS 23079 - 06202 Nice. France. ruetsch-chelli.c@chu-nice.fr

Phone: (33) 4 92 03 90 16

ORCID iDs: <https://orcid.org/0000-0001-7703-6456>

Supplementary data. Figure S1: A ceiling effect was observed at suprathreshold doses for all four drugs

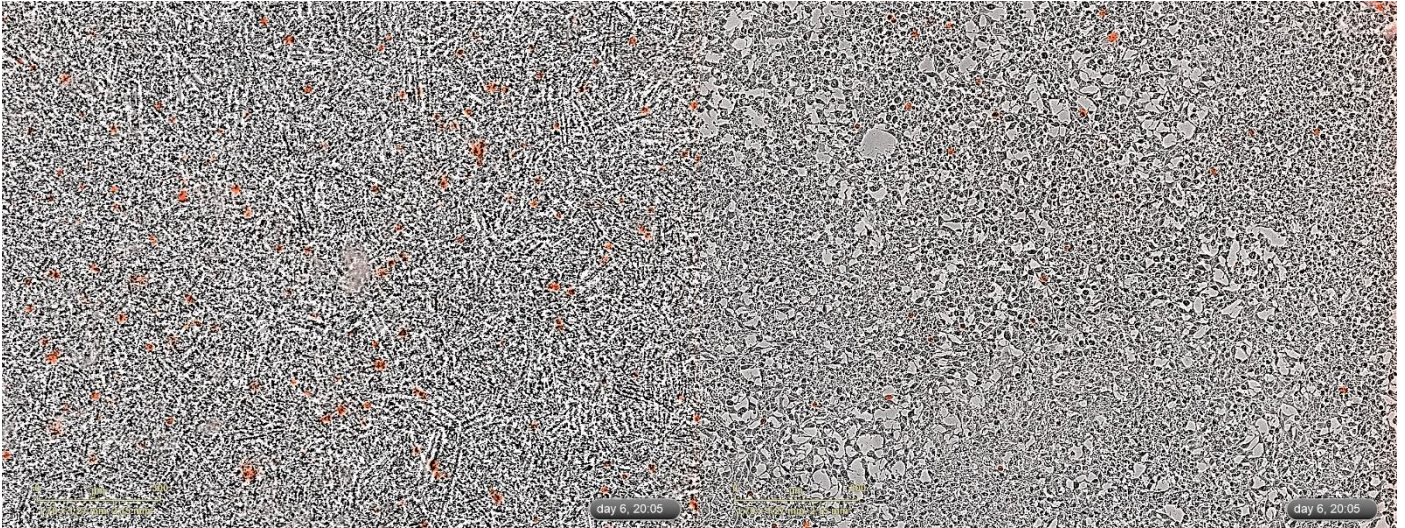

A ceiling effect was observed at suprathreshold doses for all four drugs. Confluence decreased over time or remained stable for 60 $\mu$ M concentrations in all lineages. The same effect was observed for 18 $\mu$ M concentrations for all drugs but Siponimod

Supplementary data. Figure S2: Dose effect of S1P1-RM on different melanoma cells lines

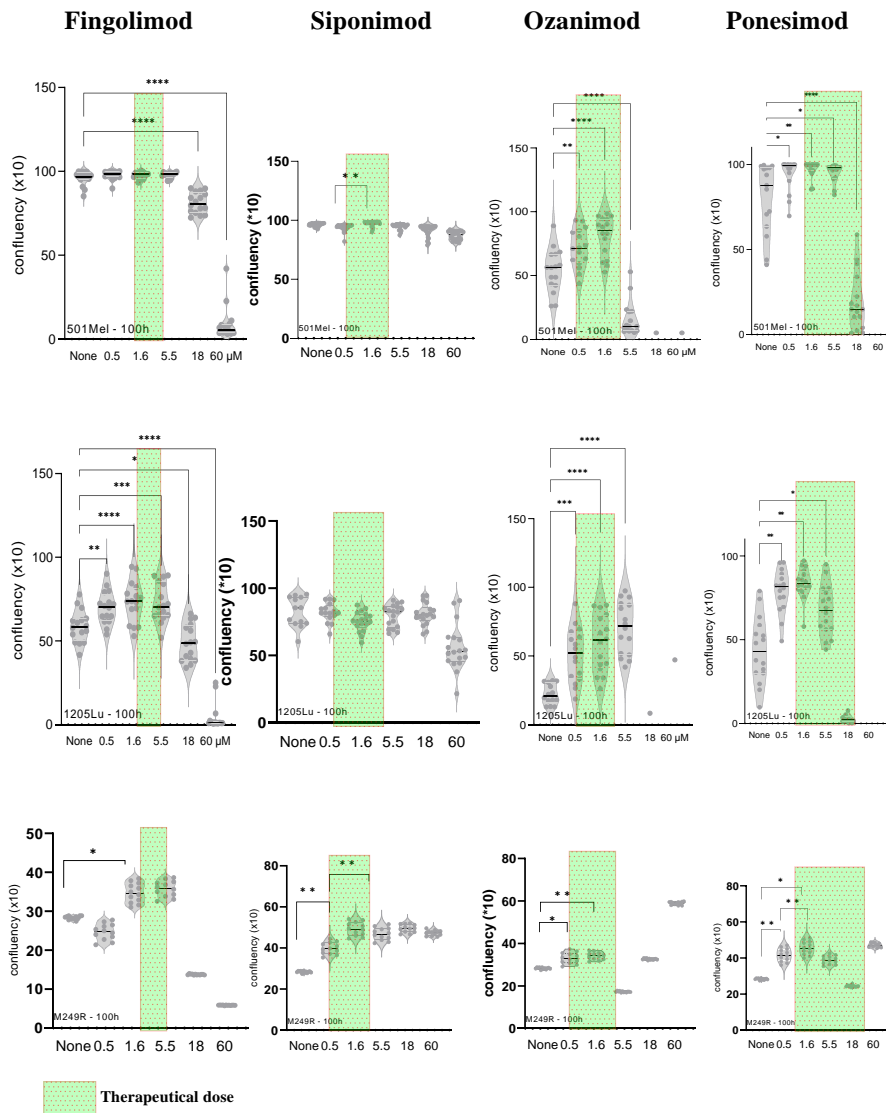

Confluence decreased over time or remained stable for 18 and 60μM concentrations
